# Supplementary material
Source: PubMed Central journal article supplement (PMC5201164)
Supplement: NIHMS838793-supplement-Appendix_A.pdf [file NIHMS838793-supplement-Appendix_A.pdf]

# Appendix A:

## Original DyNA Outputs for Matched Survivors, Non-Survivors, and All Survivors

# Index:

1. Matched Survivors (n=19)
  - 1A. Reprised Figure 4A
  - 1B-I. Original DyNA Outputs
2. Non-Survivors (n=19)
  - 2A. Reprised Figure 4B
  - 2B-I. Original DyNA Outputs
3. All Survivors (n=472)
  - 3A. Reprised Supplementary Figure S4
  - 3B-I. Original DyNA Outputs

# 1. Matched Survivors (n=19)

# 1A. Reprised Figure 4A (n=19)

## A. Survivors

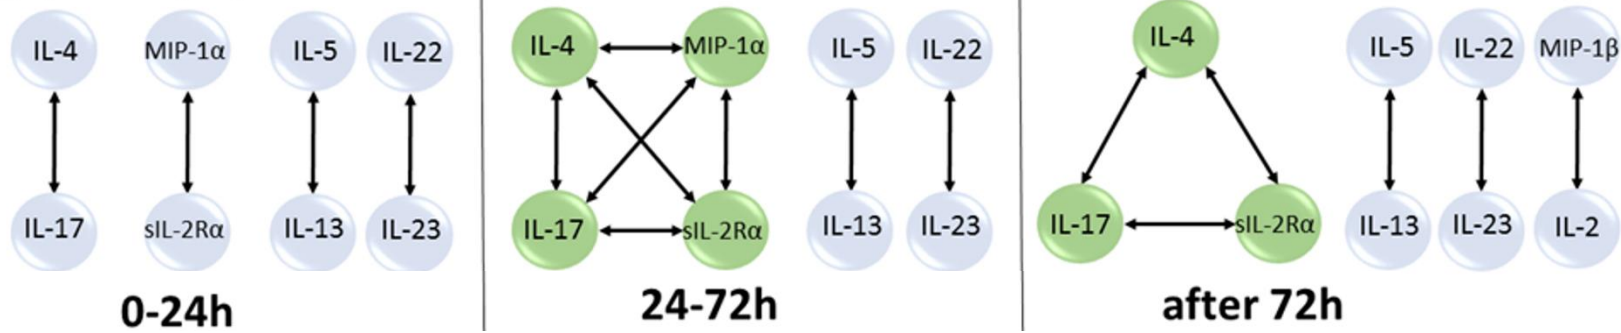

The above figure is reprised from Figure 4A of the manuscript. It summarizes the authors' interpretations of the original DyNA outputs (Appendix 1B-1I) as the networks evolve over time.

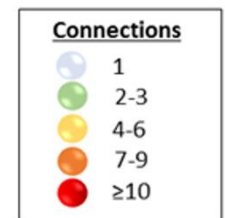

Correlation = 0.9

# 1B. Matched Survivors (0-24 Hours)

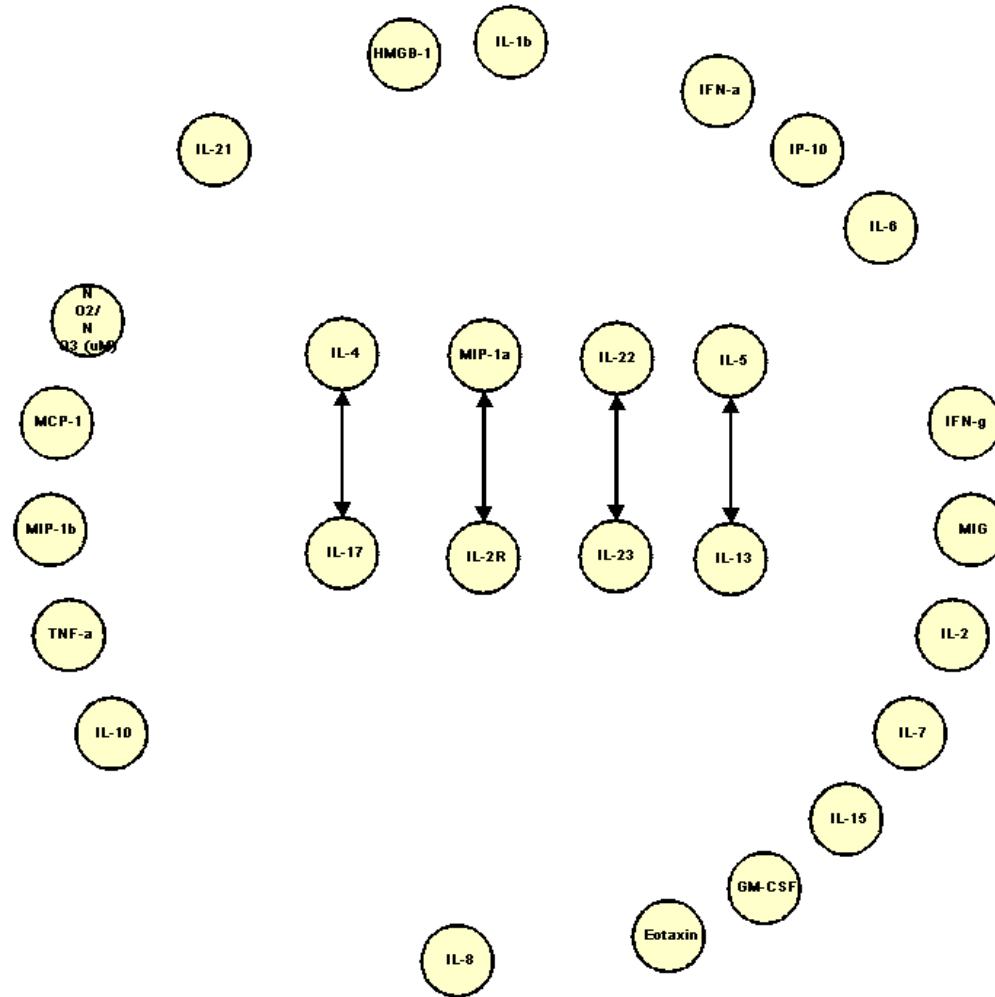

Correlation = 0.9

# 1C. Matched Survivors (8 Hours-Day 1)

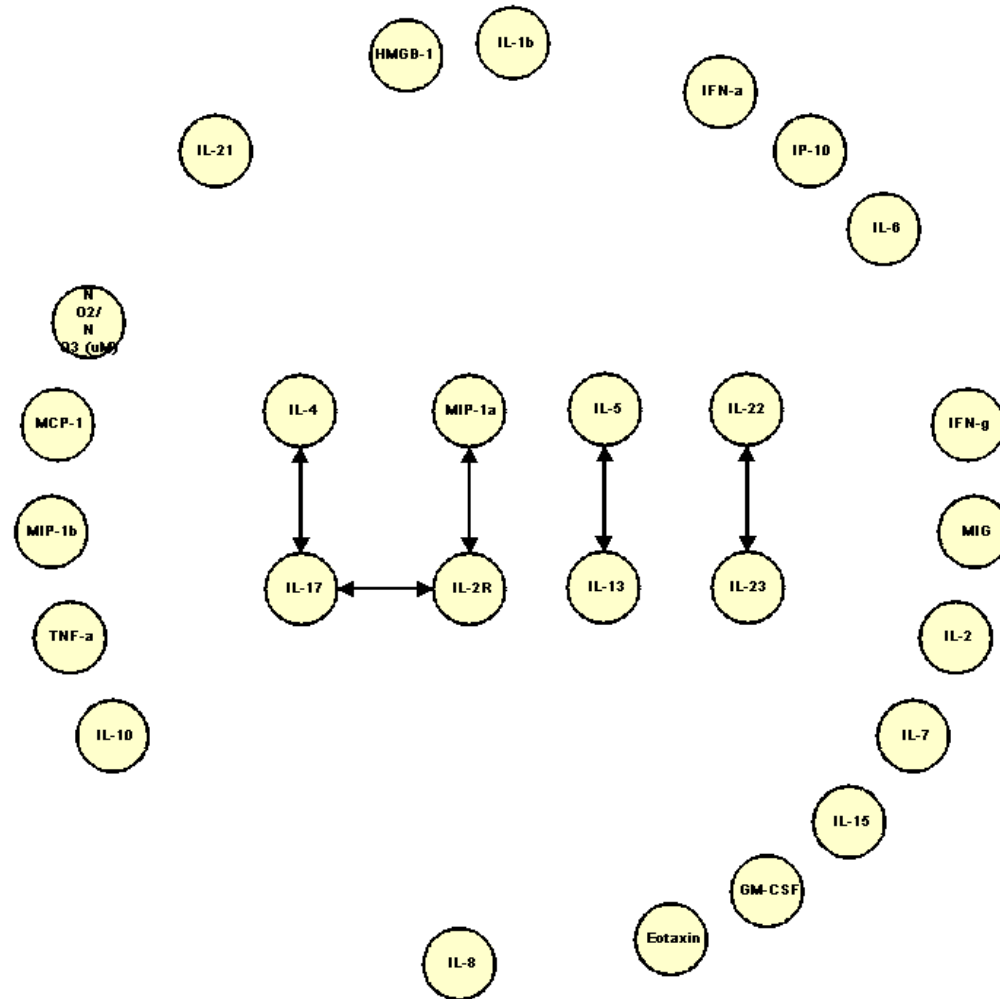

Correlation = 0.9

# 1D. Matched Survivors (16 hours-Day 2)

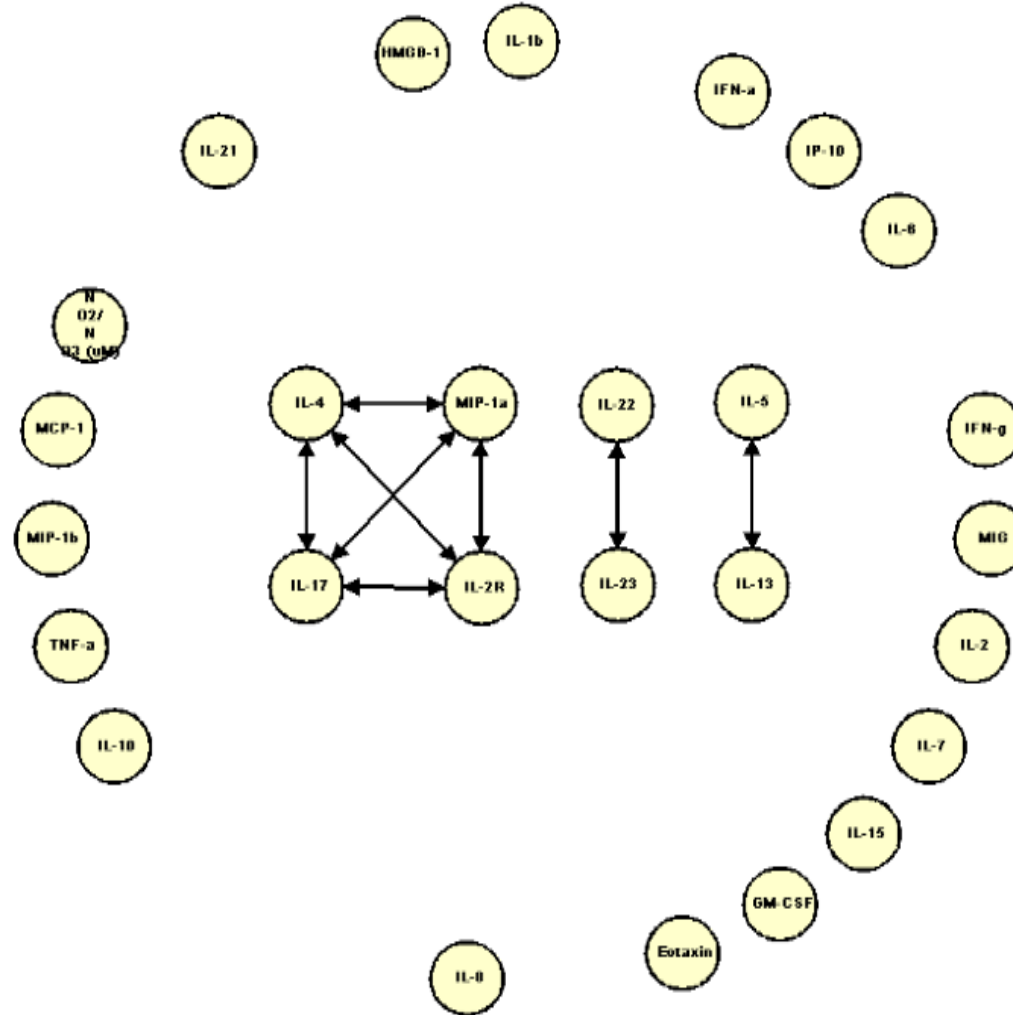

Correlation = 0.9

# 1E. Matched Survivors (Day 1-3)

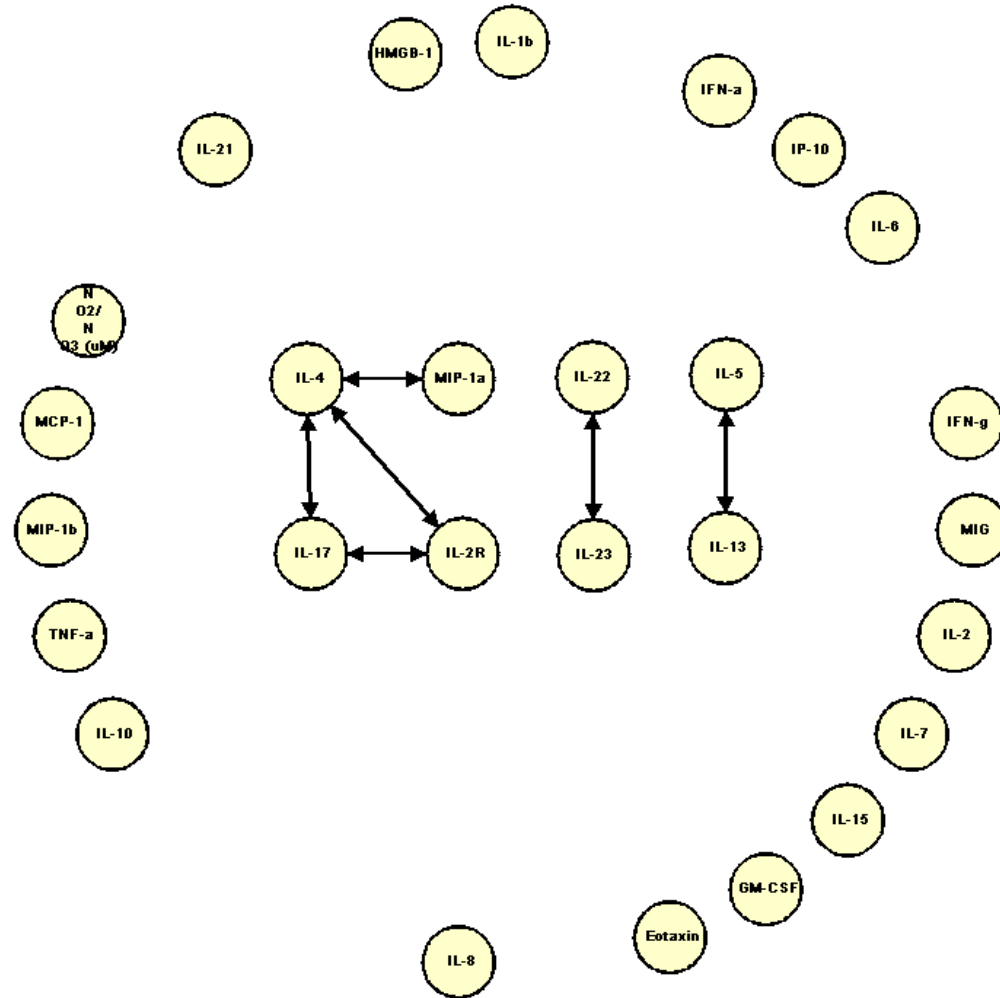

Correlation = 0.9



# 1F. Matched Survivors (Day 2-4)

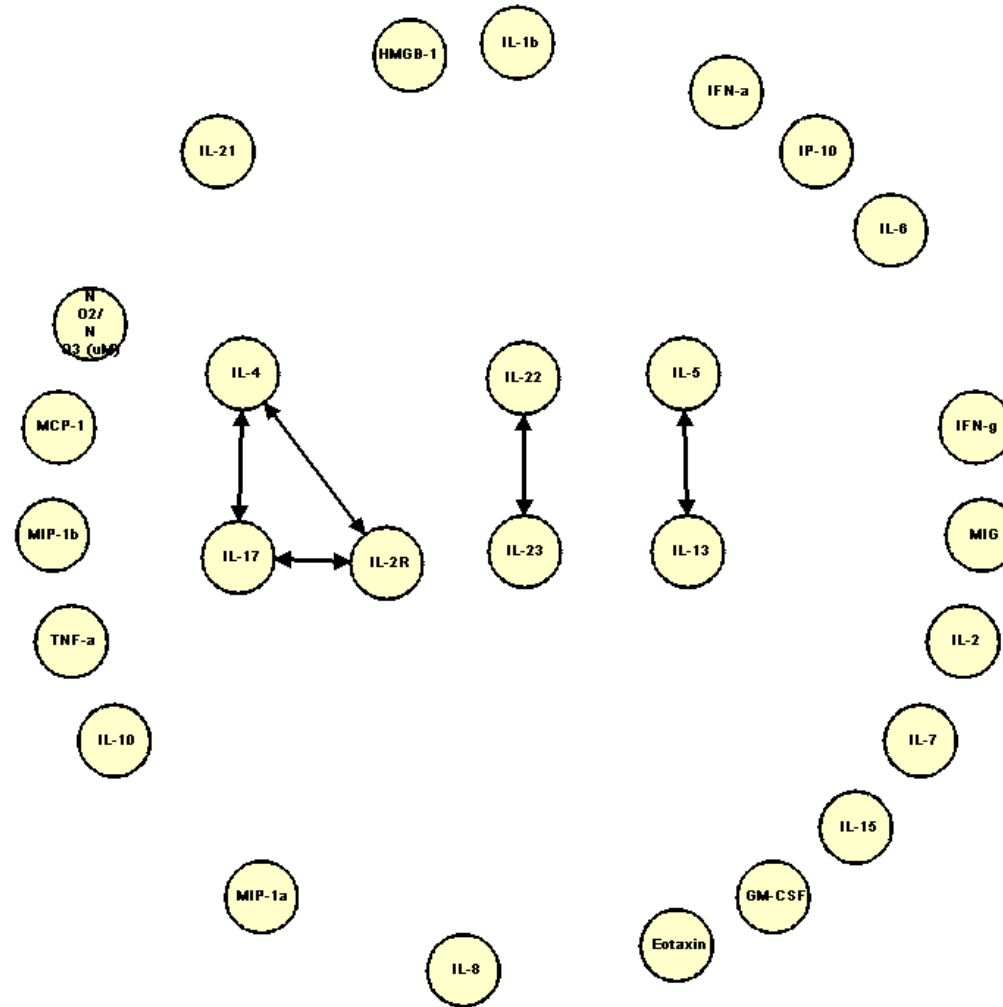

Correlation = 0.9

# 1G. Matched Survivors (Day 3-5)

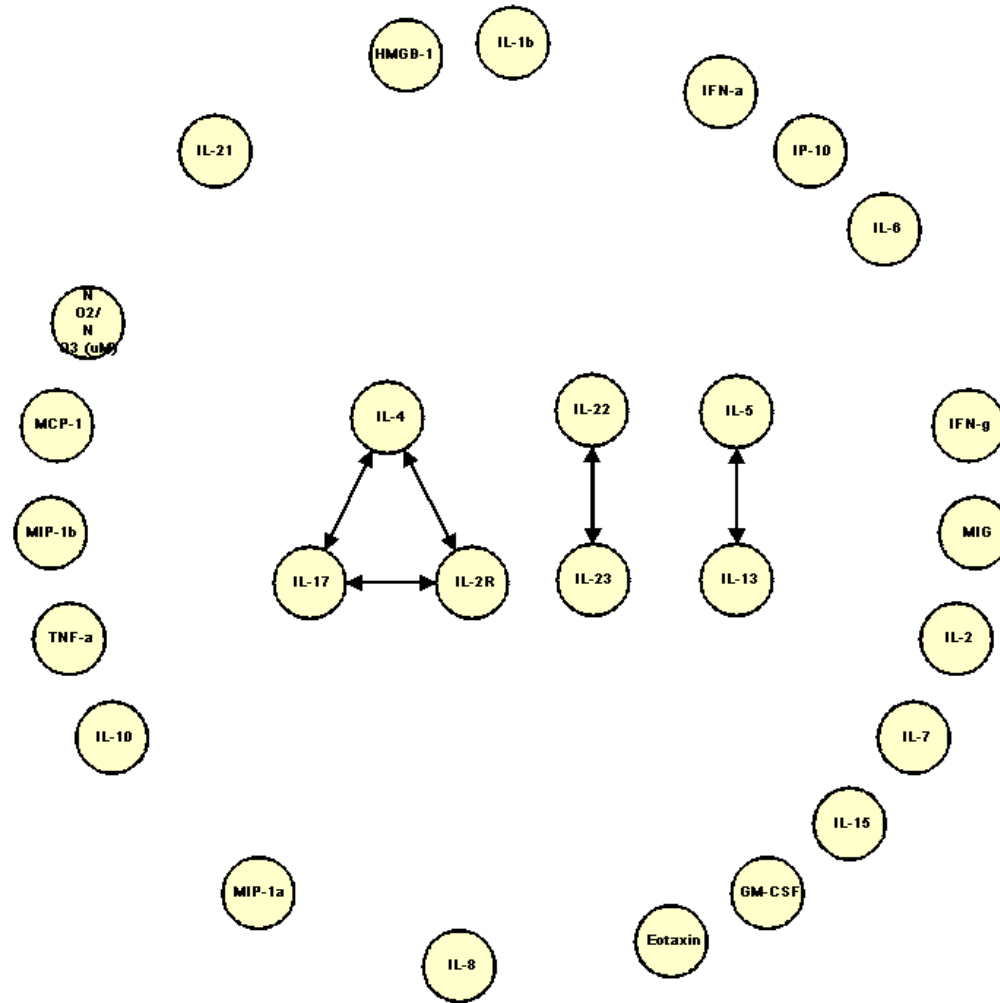

Correlation = 0.9

# 1H. Matched Survivors (Day 4-6)

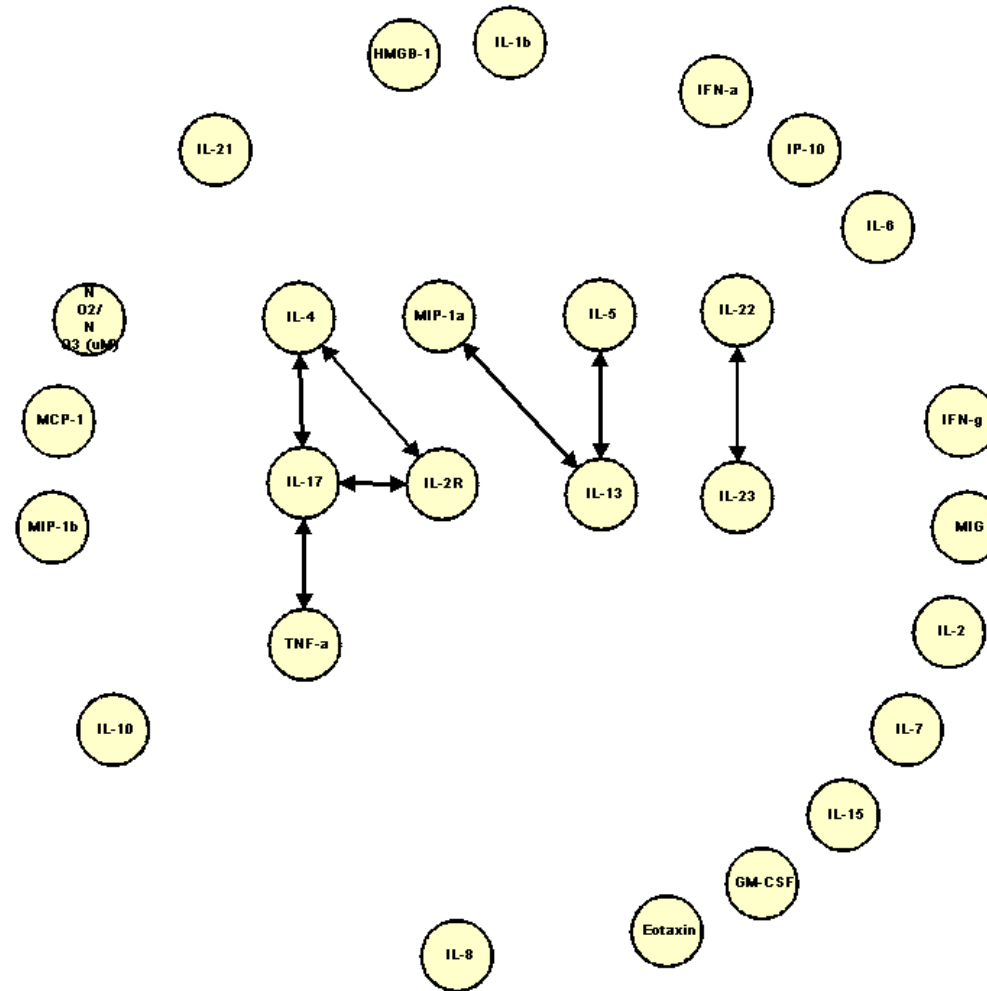

Correlation = 0.9

# 1I. Matched Survivors (Day 5-7)

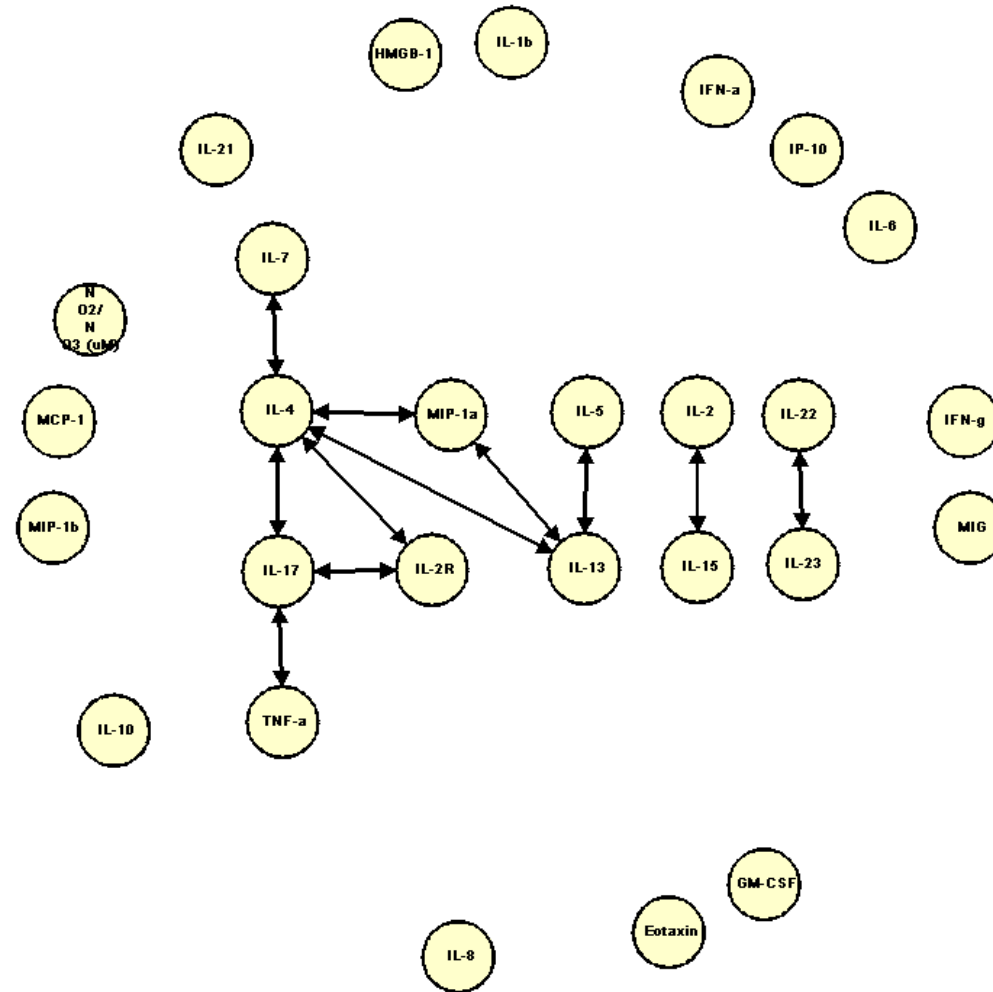

Correlation = 0.9

## 2. Non-Survivors (n=19)

# 2A. Reprised Figure 4B (n=19)

## B. Non-Survivors

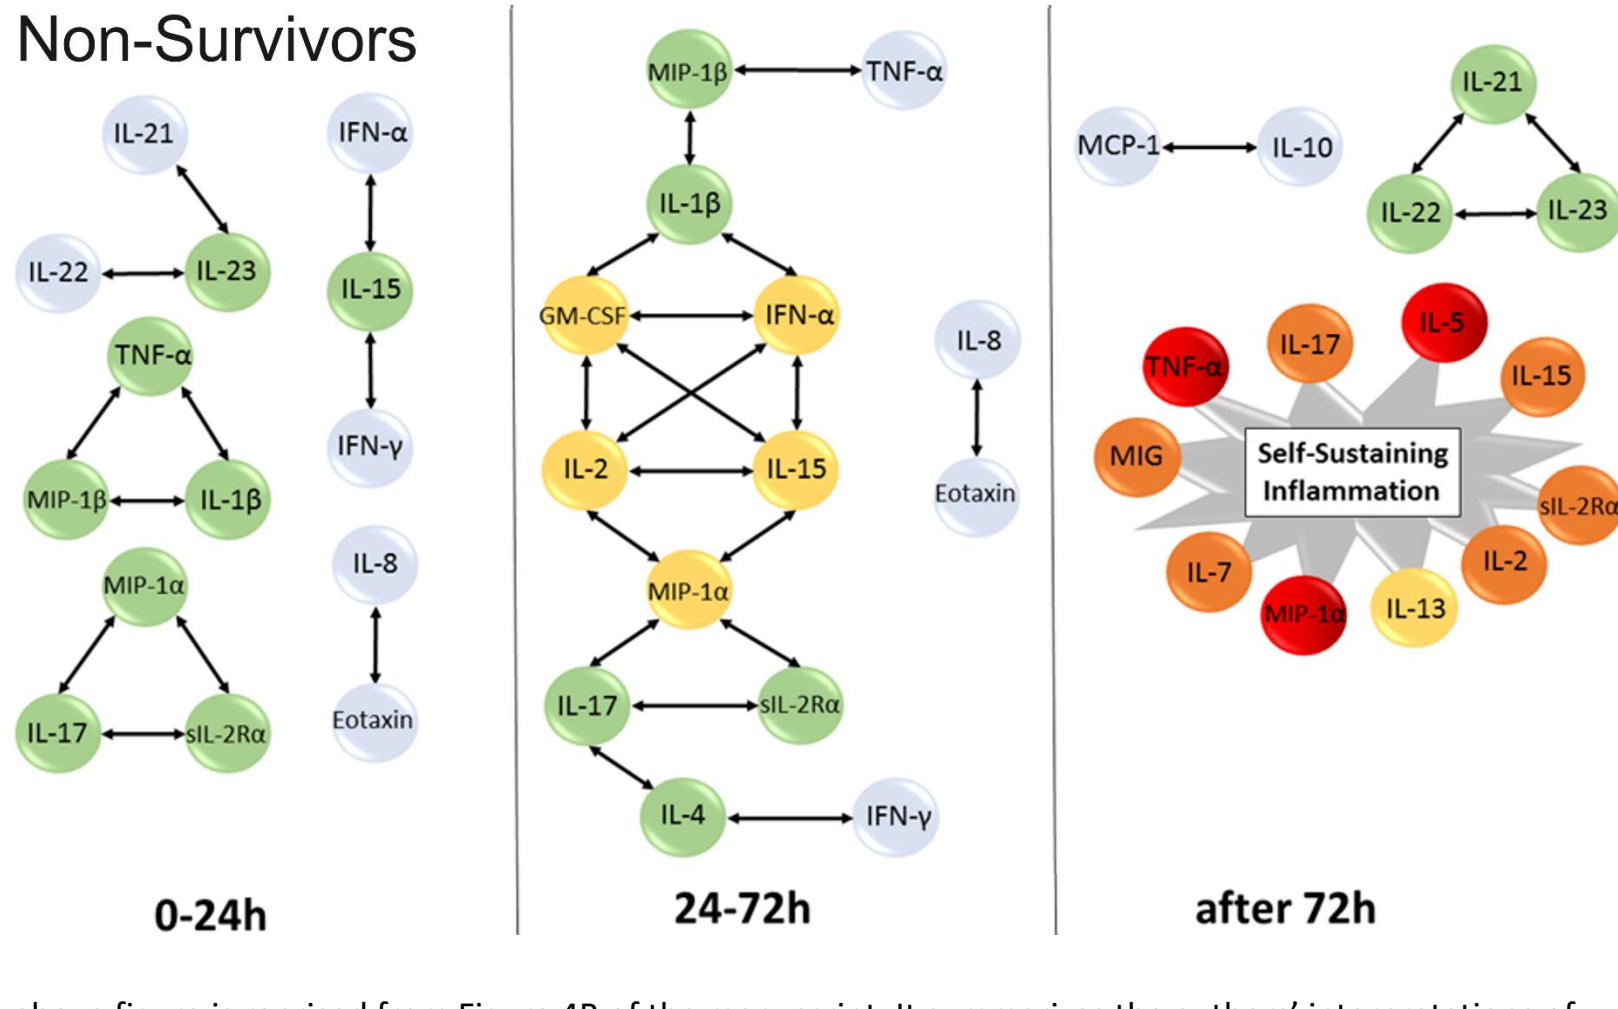

The above figure is reprised from Figure 4B of the manuscript. It summarizes the authors' interpretations of the original DyNA outputs (Appendix 2B-11) as the networks evolve over time.

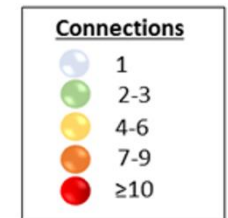

Correlation = 0.9

# 2B. Non-Survivors (0-24 Hours)

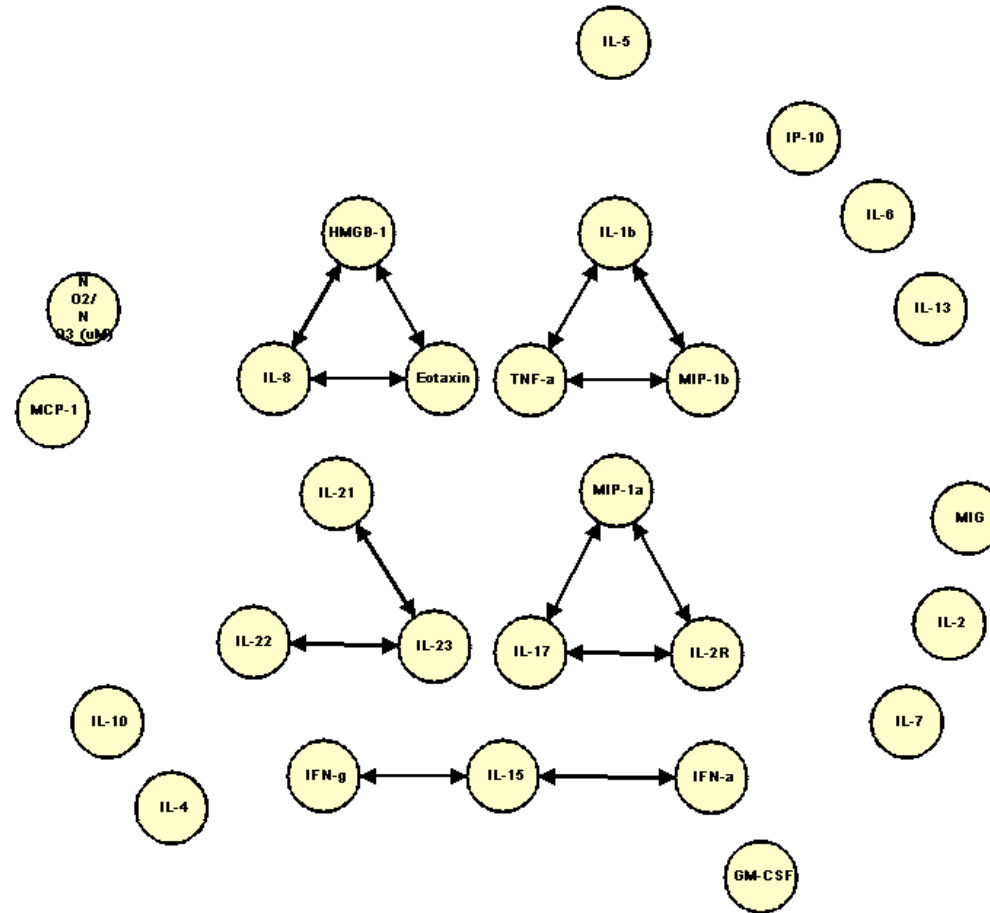

Correlation = 0.9

## 2C. Non-Survivors (8 Hours-Day 1)

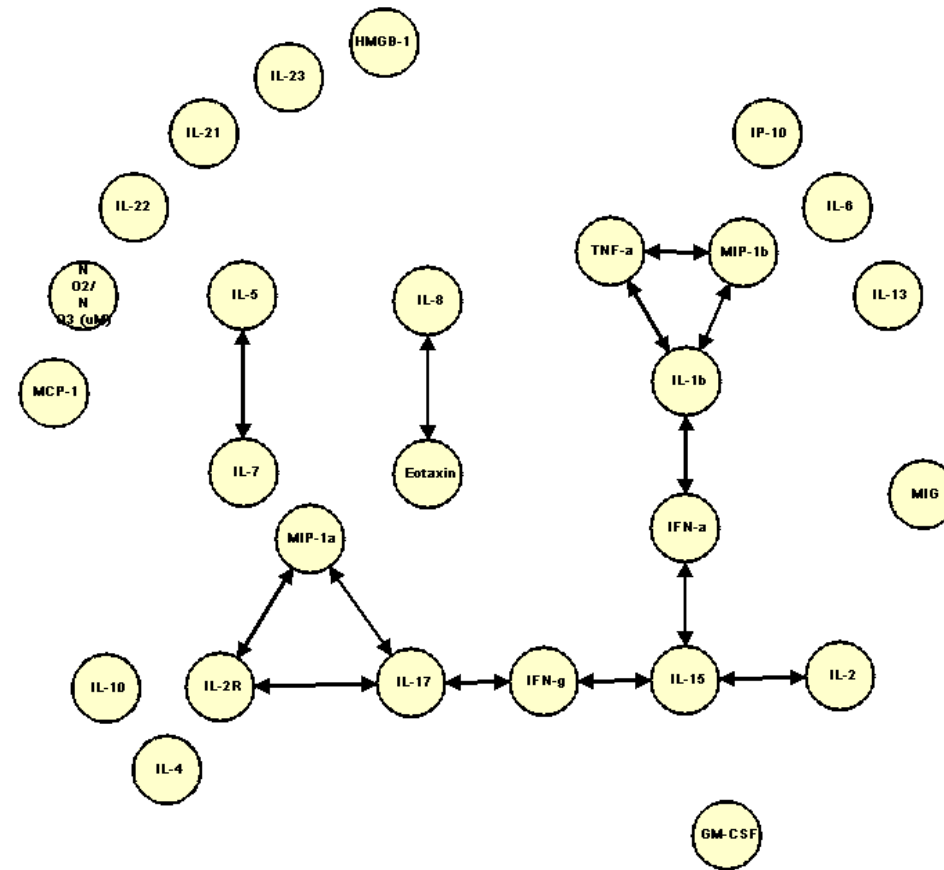

Correlation = 0.9





# 2E. Non-Survivors (Day 1-3)

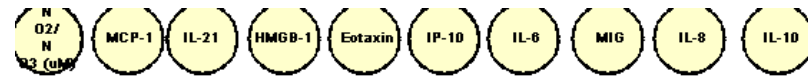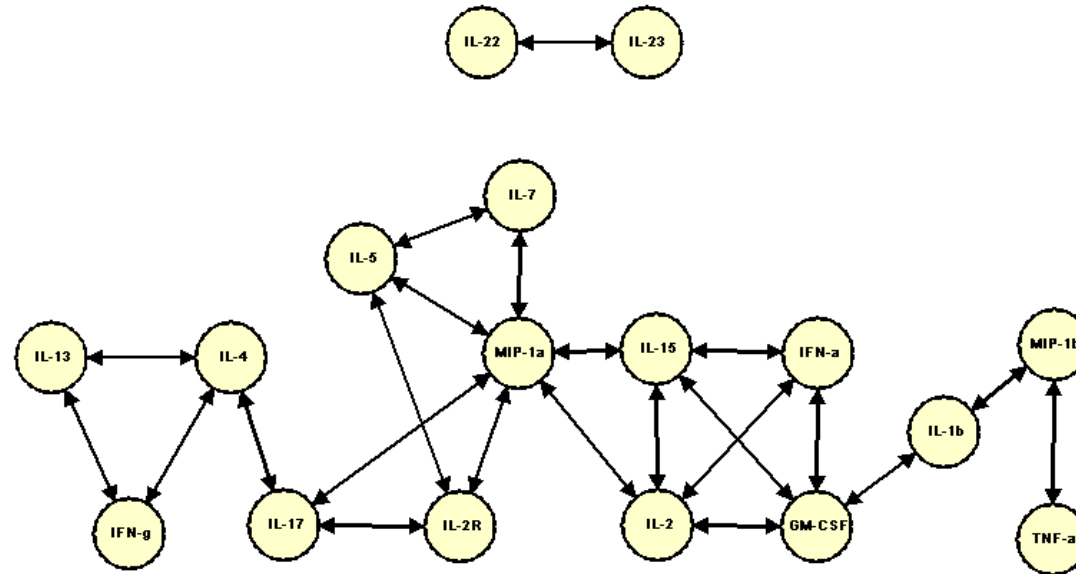

Correlation = 0.9

# 2F. Non-Survivors (Day 2-4)

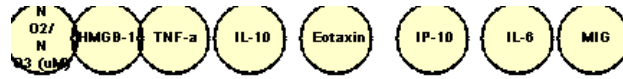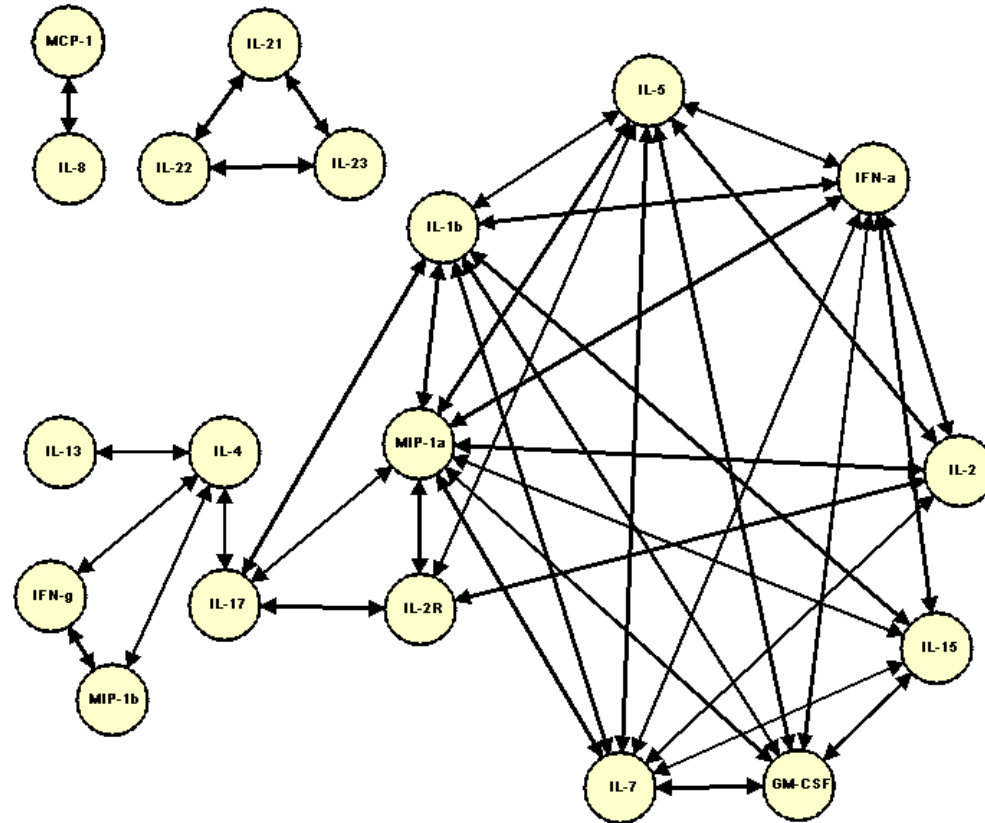

Correlation = 0.9

# 2G. Non-Survivors (Day 3-5)

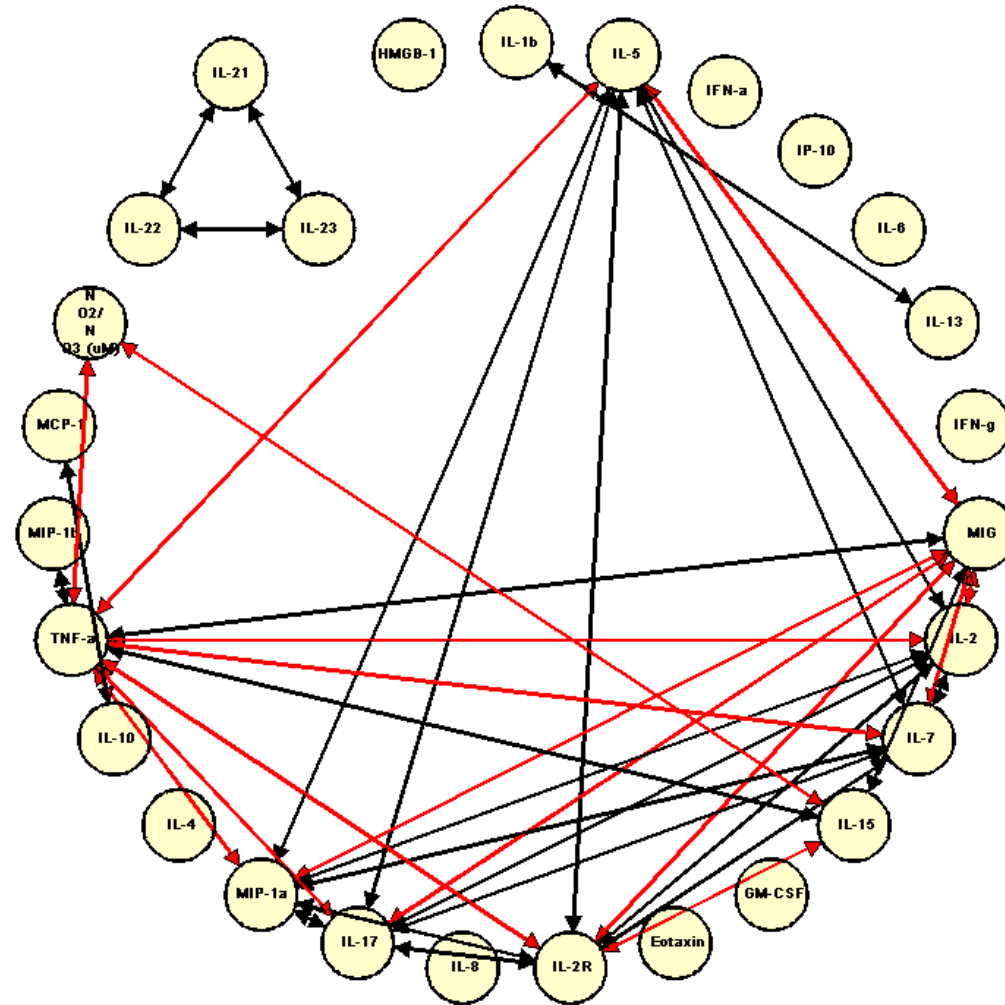

Correlation = 0.9

## 2H. Non-Survivors (Day 4-6)

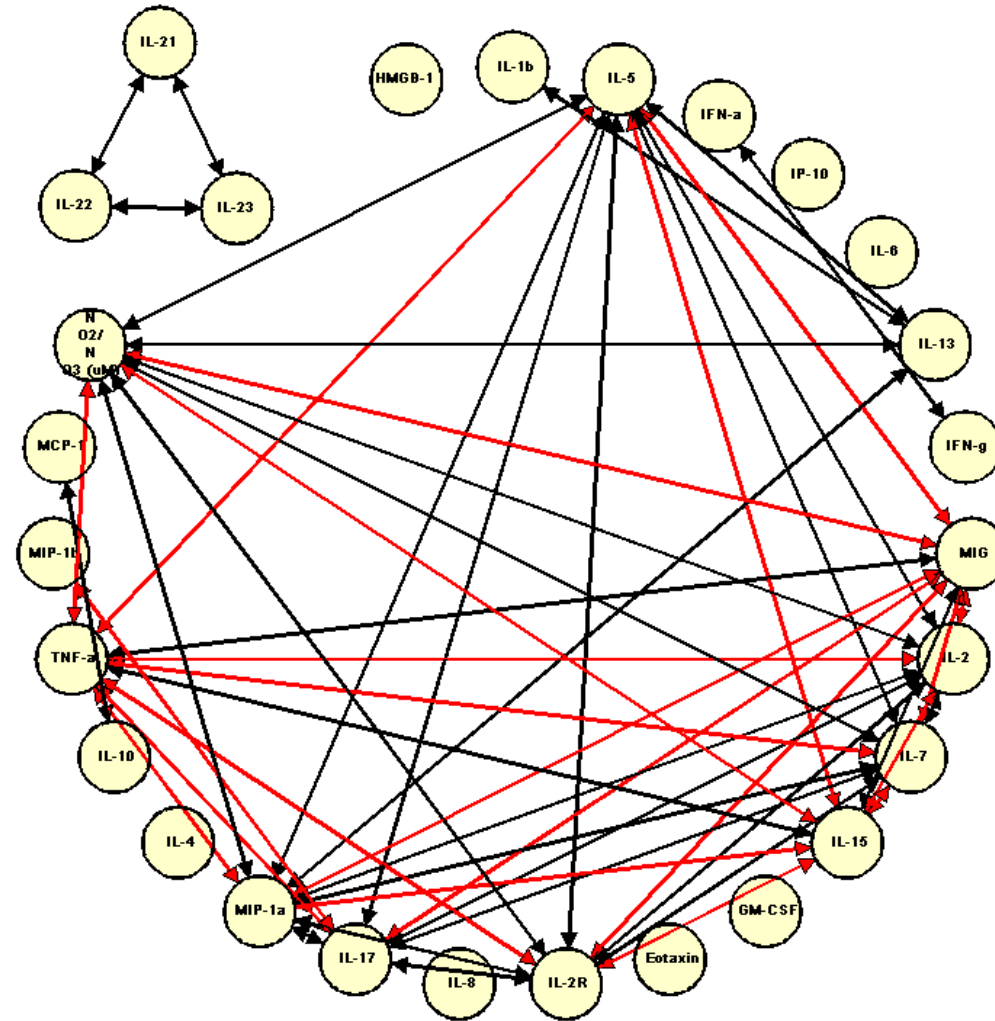

Correlation = 0.9

# 1I. Non-Survivors (Day 5-7)

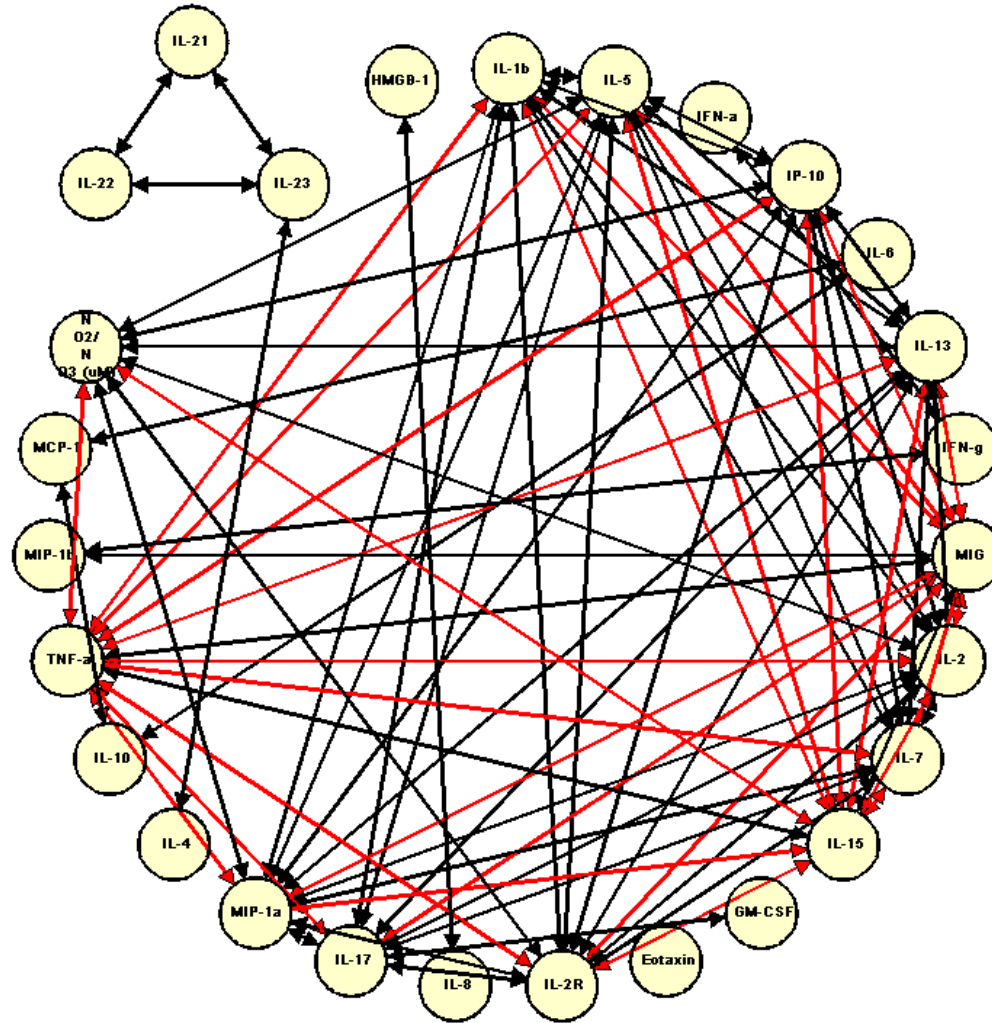

Correlation = 0.9

# 3. All Survivors (n=472)

# 3A. Reprised Supplementary Figure S4 (n=472)

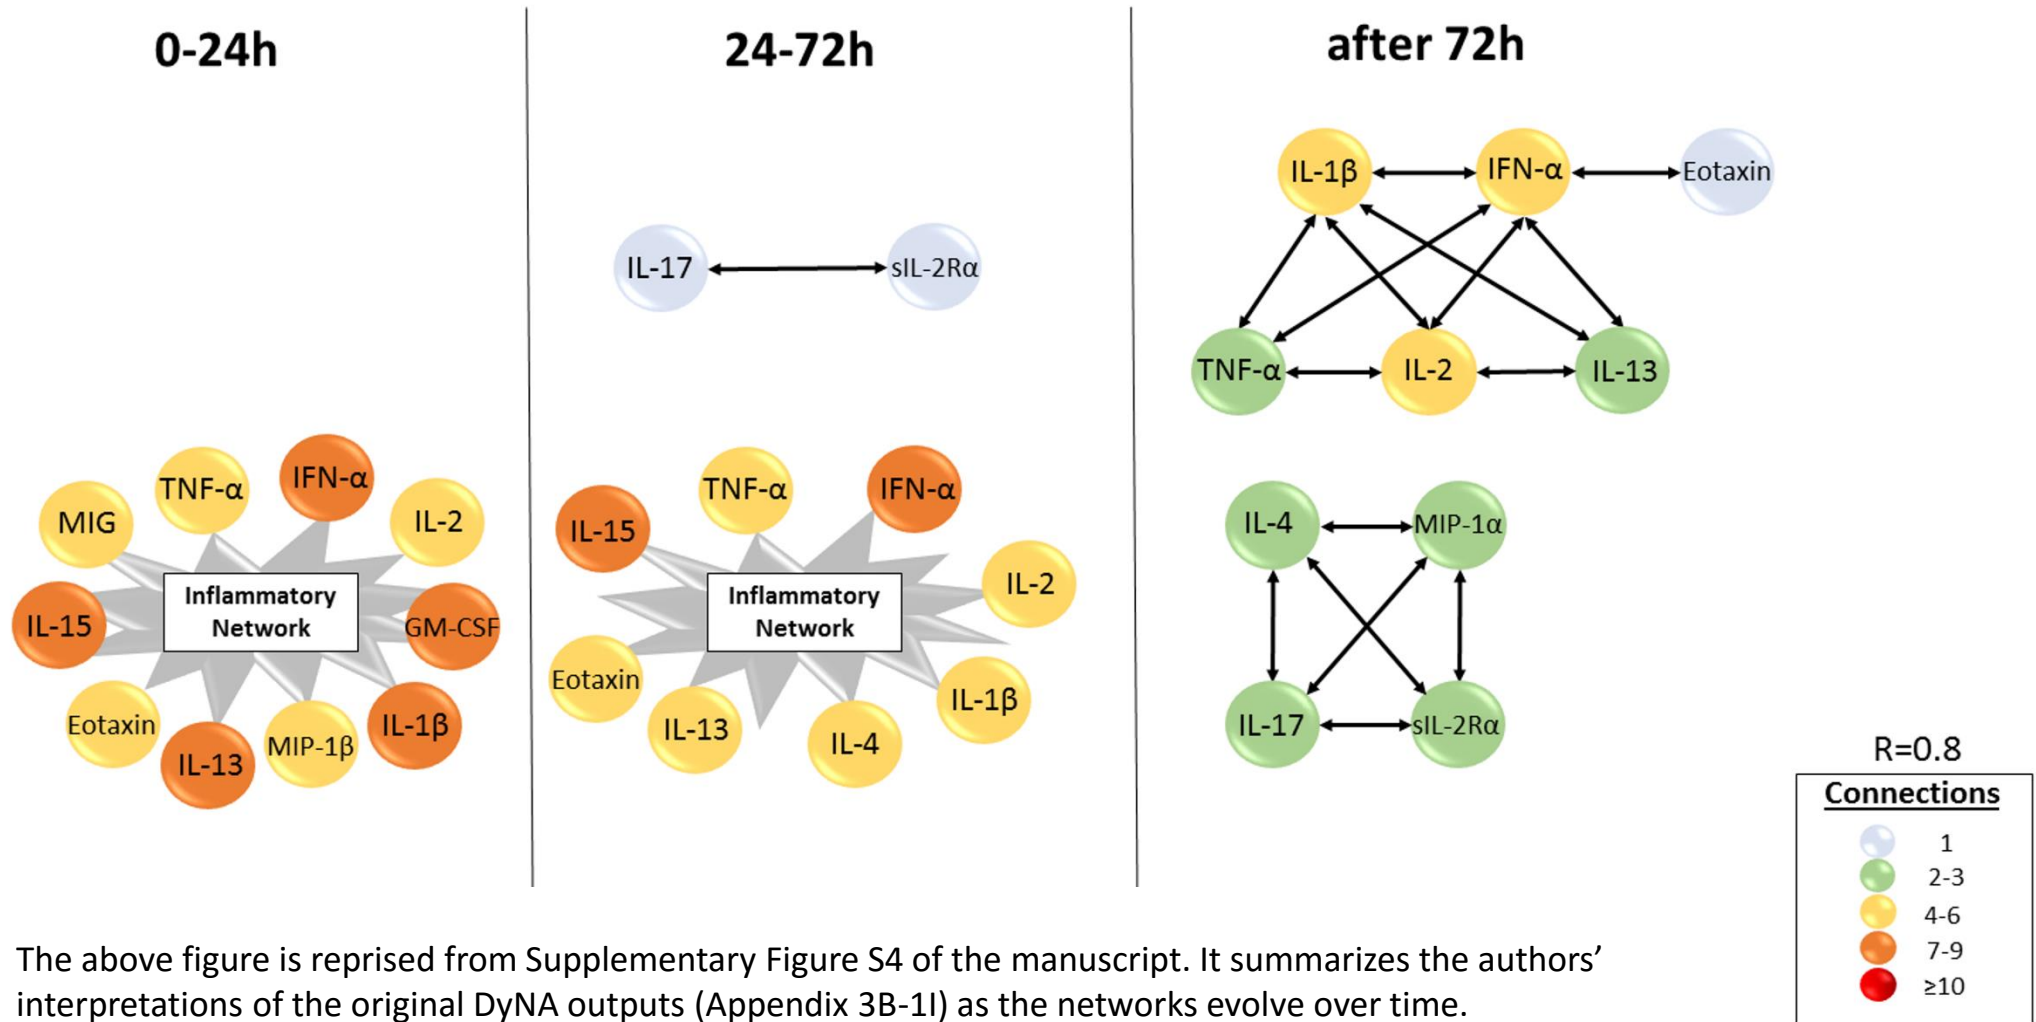

The above figure is reprised from Supplementary Figure S4 of the manuscript. It summarizes the authors' interpretations of the original DyNA outputs (Appendix 3B-1I) as the networks evolve over time.



# 3B. All Survivors (0-24 Hours)

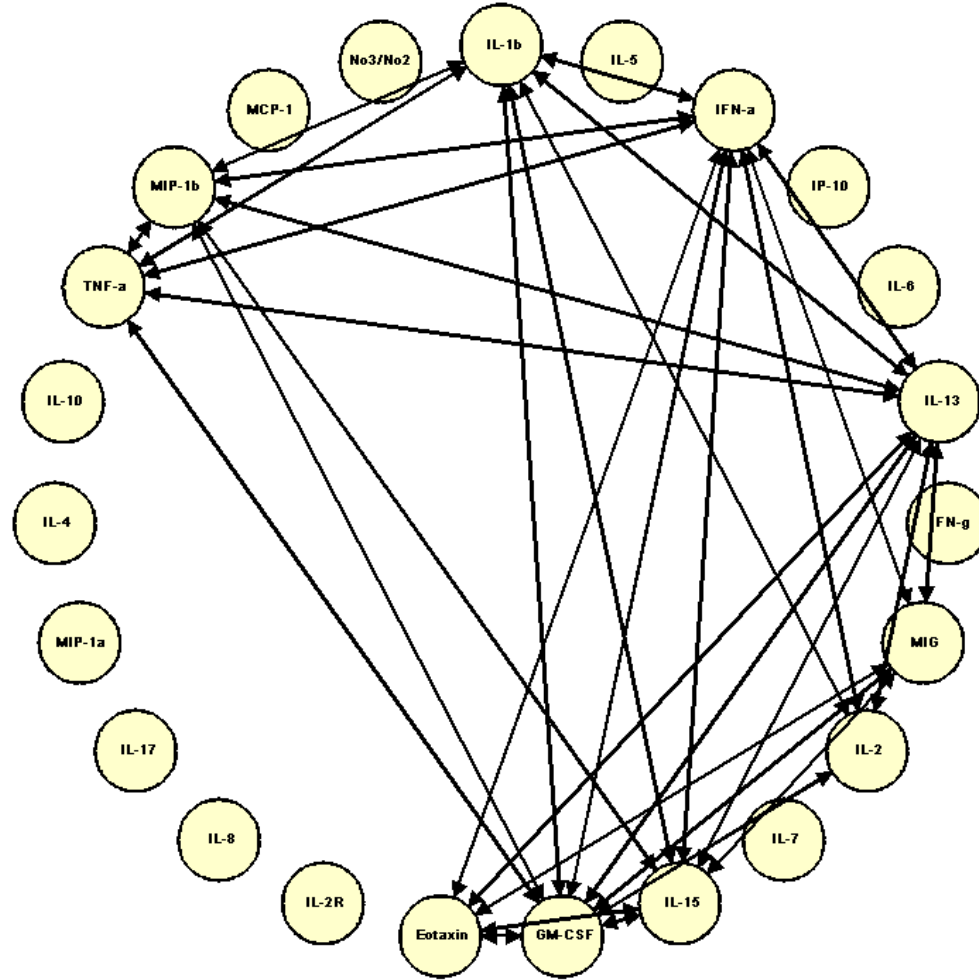

Correlation = 0.8

# 3C. All Survivors (8 Hours-Day 1)

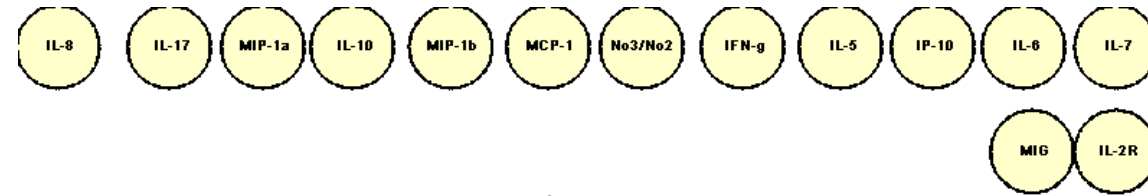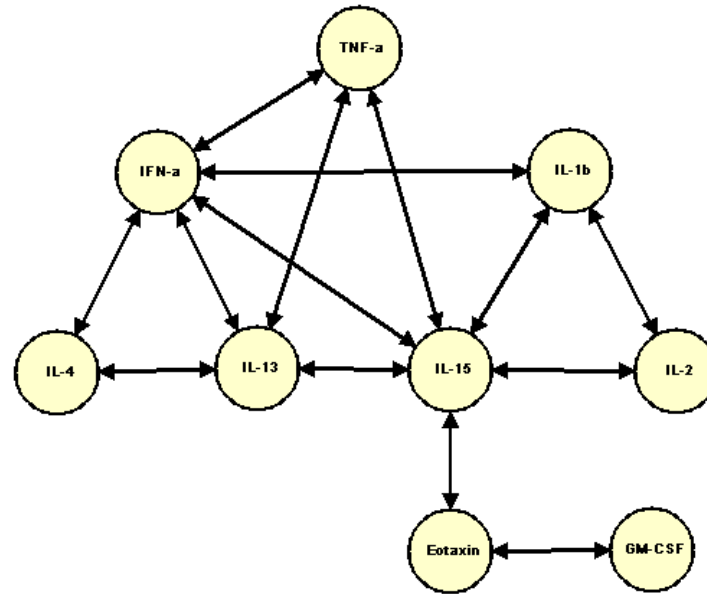

Correlation = 0.8

# 3D. All Survivors (16 hours-Day 2)

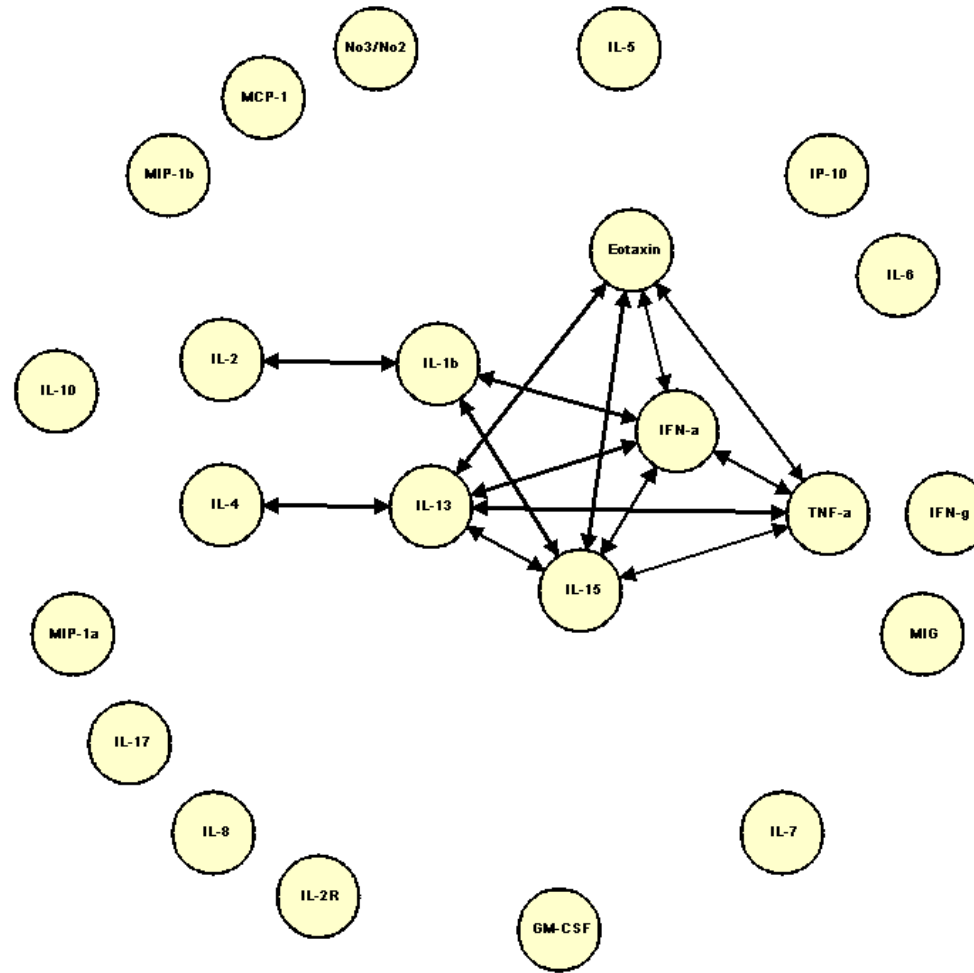

Correlation = 0.8

# 3E. All Survivors (Day 1-3)

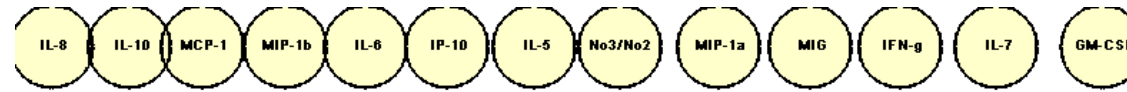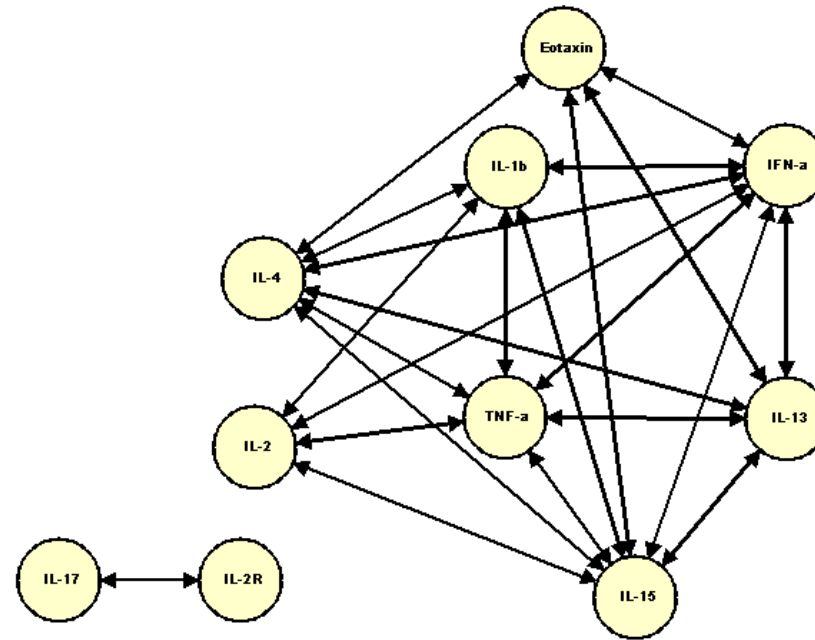

Correlation = 0.8

# 3F. All Survivors (Day 2-4)

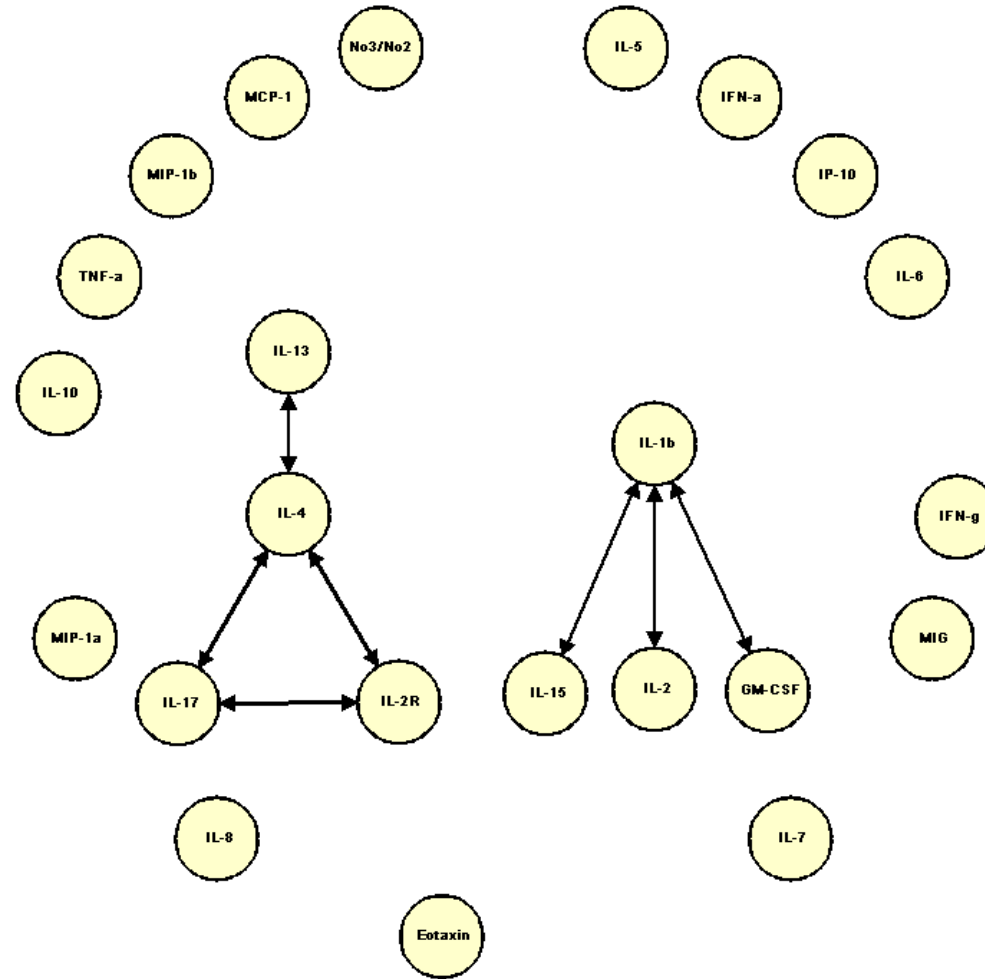

Correlation = 0.8

# 3G. All Survivors (Day 3-5)

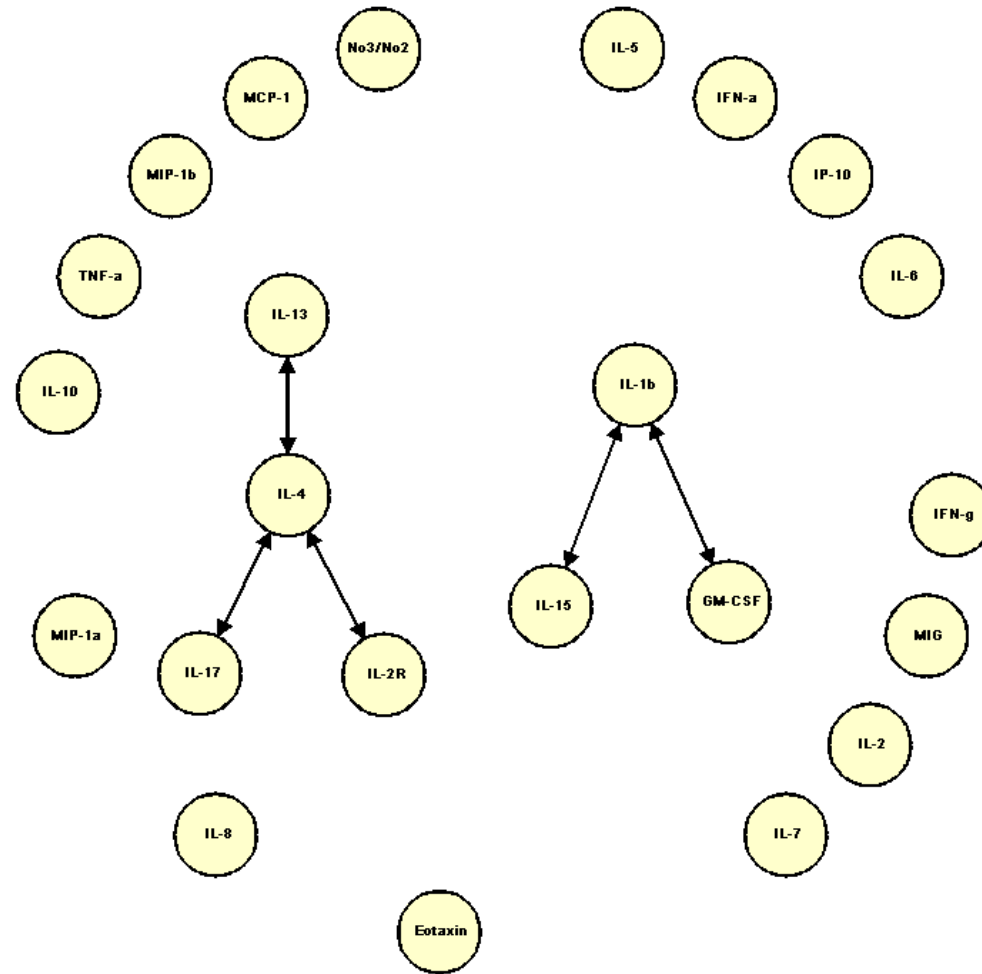

Correlation = 0.8

# 3H. All Survivors (Day 4-6)

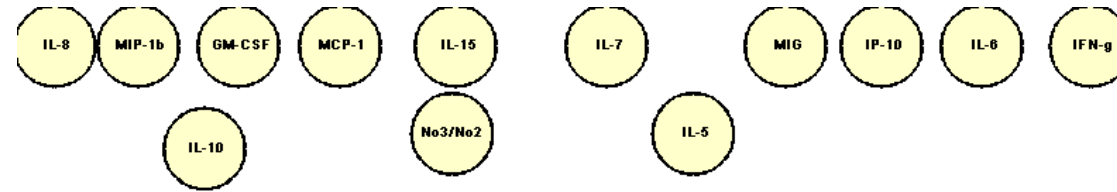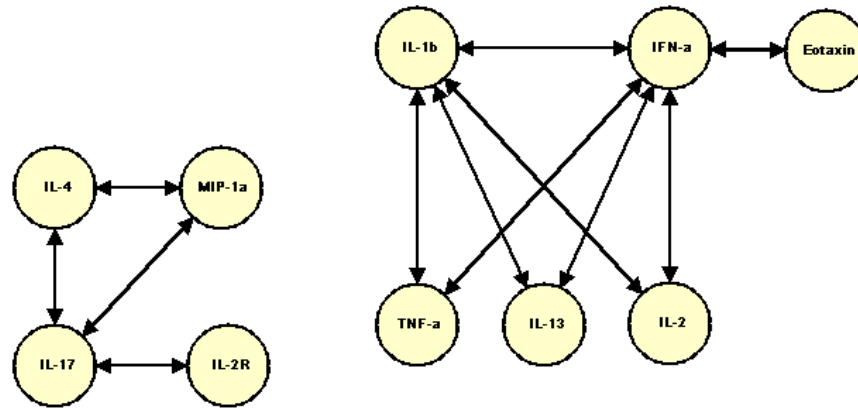

Correlation = 0.8

# 31. All Survivors (Day 5-7)

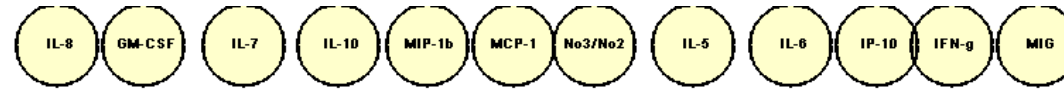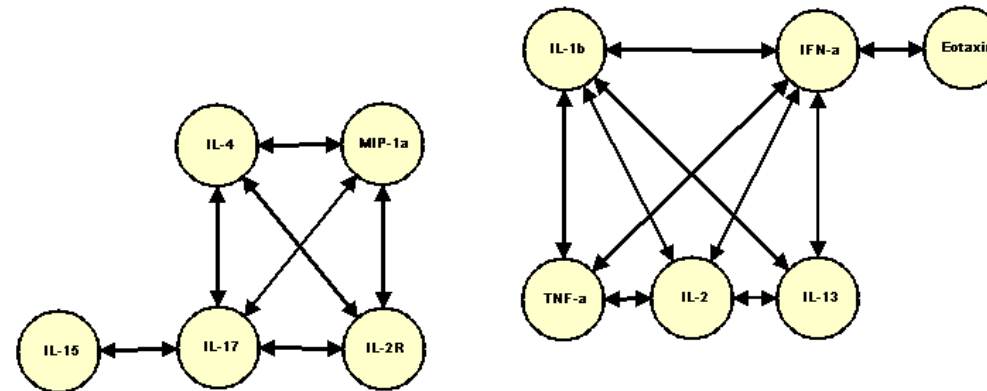

Correlation = 0.8
